# Supplementary material for: Measurements of volatile organic compounds in the middle of Central East China during Mount Tai Experiment 2006 (MTX2006): observation of regional background and impact of biomass burning
Source: Copernicus journal article supplement (doi:10.5194/acp-10-1269-2010), 2010-02-05
Supplement: Supplementary file 1 [file acp-10-1269-2010-supplement.pdf]

**Table S1.** Daytime and nighttime averaged and SD of selected VOCs from measurement at Mount Tai. Units are all in pptv.

|           | Average (day) | SD  | Average (night) | SD   |
|-----------|---------------|-----|-----------------|------|
| Ethane    | 2550          | 697 | 1655            | 805  |
| Propane   | 679           | 323 | 321             | 181  |
| i-Butane  | 171           | 86  | 85              | 55   |
| n-Butane  | 232           | 141 | 91              | 57   |
| i-Pentane | 191           | 91  | 77              | 63   |
| n-Pentane | 94            | 53  | 41              | 26   |
| Ethene    | 1050          | 703 | 712             | 840  |
| Propene   | 119           | 45  | 64              | 21   |
| Acetylene | 1746          | 920 | 924             | 1016 |
| Benzene   | 697           | 323 | 361             | 376  |
| Toluene   | 225           | 115 | 103             | 124  |
| Isoprene  | 207           | 184 | 4               | 9    |
